# Supplementary material
Source: PubMed Central journal article supplement (PMC2705241)
Supplement: NIHMS103392-supplement-1_si_001.pdf [file NIHMS103392-supplement-1_si_001.pdf]

**Supporting Information: Does water relay play an important role in phosphoryl transfer reactions? Insights from theoretical study of a model reaction in water and *tert*-butanol**

Yang Yang, Qiang Cui

Department of Chemistry and Theoretical Chemistry Institute,  
University of Wisconsin, Madison, 1101 University Ave, Madison, WI 53706

**1. Test for the MM model of *tert*-butanol**

As shown in Table S1, a few key properties (density, diffusion constant and heat of vaporization) are well reproduced by the MM model for the *tert*-butanol.

**2. Benchmark calculations for SCC-DFTBPR for pseudo-rotation barriers**

As pointed by York et al.,<sup>1</sup> conventional semiempirical methods (MNDO, AM1, PM3 and MNDO/d methods are tested) are not reliable for pseudo-rotation and that generally the difference between the semi-empirical and DFT results exceed 50% of the actual barrier at the DFT level. Therefore, it is crucial to test the performance of SCC-DFTBPR in this context to show that the corresponding PMFs that we calculate are meaningful. Accordingly, we have selected representative pseudo-rotation processes from the QCRNA database<sup>2</sup> (10 neutral plus 10 negatively charged cases) and compared the SCC-DFTBPR barriers to high-level DFT data in that database; for further comparison, we have also included results from the second-order SCC-DFTB and a

number of standard semi-empirical methods (see Table S2, S3 and S4). in the **Supporting Materials**).

If the B3LYP/6-31++G(d,p) structures are used and only single point energy calculations are performed, SCC-DFTBPR gives consistently better results than the popular semi-empirical methods. For example, for the 10 neutral systems (5 acyclic and 5 cyclic), SCC-DFTBPR has a RMSE of 2.09 kcal/mol, while the values for AM1, PM3, MNDO are 3.20, 5.50, 3.85 kcal/mol, respectively; the second order SCC-DFTB has a similar RMSE of 2.50 kcal/mol. For the 10 negatively charged cases, the performance becomes worse for all methods; the RMSE for SCC-DFTBPR is 3.72 kcal/mol, and the values for AM1, PM3 and MDNO are 7.51, 5.01 and 5.73 kcal/mol, respectively. The exception is that the second-order SCC-DFTB remains close to the high-level DFT results with a RMSE of 1.6 kcal/mol, even smaller than for the neutral cases.

Besides the single-point calculations, geometry optimizations also indicate that SCC-DFTBPR is a reasonable method for describing pseudo-rotation. For example, for the P(O)(OH)(-O-sugar-O-)(OCH3)\_PR case from QCRNA data base, which is structurally similar to the model UNP studied here, the SCC-DFTBPR barrier after geometry optimization is 5.76 kcal/mol, which is only 0.10 kcal/mol higher than the B3LYP/6-311++G(3df,2p)//B3LYP/6-31++G(d,p) reference. For more test cases, see Table S4.

These gas-phase benchmark calculations indicate that SCC-DFTBPR can be used to meaningfully compare the energetics of pseudo-rotation for the UNP system in different solutions.

### **3. van der Waals parameters for the SCC-DFTBPR atoms**

As shown in Fig. S1, the radial distributions of the solvent (water) near the solute (model UNP) do not change in any major way when the QM region expands from solute-only to include all water molecules within 6 Å from the phosphorus atom or the oxygen in the ribose ring; the results also do not change when different van der Waals parameters (i.e., using the CHARMM parameters vs. optimized values for the key oxygen atoms:  $\epsilon = -0.1397$  kcal/mol;  $r_0 = 1.698$  Å) are used for the solute-QM simulations. This suggests that the QM/MM results reported in the main text are not expected to depend sensitively on the van der Waals parameters for the QM atoms.

#### **4. Reaction coordinate for the pseudo-rotation PMF calculations**

As shown in Fig. S2, there is clear linear correlations between the approximate reaction coordinate ( $d(O_7-O_{12})-d(O_8-O_{11})$ ) and the relevant angles that characterize the pseudo-rotation process in both the aqueous and *tert*-butanol simulations. Therefore, the computed PMF profiles can be meaningful compared to characterize the energetic differences between the two solution conditions.

#### **5. Full Reference for CHARMM 22 force field (Ref. 40 in main text)**

MacKerell, A. D.; Bashford, D.; Bellott, M.; Dunbrack, R. L.; Evanseck, J. D.; Field, M. J.; Fischer, S.; Gao, J.; Guo, H.; Ha, S.; Joseph-McCarthy, D.; Kuchnir, L.; Kuczera, K.; Lau, F. T. K.; Mattos, C.; Michnick, S.; Ngo, T.; Nguyen, D. T.; Prodhom, B.; Reiher, W. E.; Roux, B.; Schlenkrich, M.; Smith, J. C.; Stote, R.; Straub, J.; Watanabe, M.; Wiorkiewicz-Kuczera, J.; Yin, D.; Karplus, M. *J. Phys. Chem. B* **1998**, 102, 3586–3616.

## References

1. (a) C. S. Lopez, O. N. Faza, B. A. Gregersen, X. Lopez, A. R. de Lera and D. M. York, *ChemPhysChem*. 5, 1045-1049 (2004) (b) C. S. Lopez, O. N. Faza, A. R. de Lera and D. M. York, *Chem. Eur. J.* 11, 2081-2093 (2005)
2. T. J. Giese et al., and D. M. York, *J. Mol. Graph. Model.* 25, 423-433 (2006)
3. D. Riccardi, G. Li and Q. Cui, *J. Phys. Chem. B* 108, 6467-6478 (2004)

## Figure Captions

### Figure S1.

Radial distribution functions,  $g(r)$  (solid lines) and running coordinate numbers,  $rcn$  (dashed lines), of water oxygen around different oxygen atoms of the model UNP in SCC-DFTBPR/MM simulations. Black indicates simulations in which the QM region includes the model UNP and the first solvation shell (within 6 Å from the phosphorus atom or the oxygen atom in the ribose ring; the partitioning of the QM/MM water molecules is updated on the fly). Red/green indicates simulations with only the solute treated as QM; the van der Waals parameters in those simulations are either the standard CHARMM parameters (red) or optimized based on standard protocols (green).<sup>3</sup>

### Figure S2.

Correlation between the defined reaction coordinate ( $d(O_7-O_{12})-d(O_8-O_{11})$ ) and the relevant angles that characterize the pseudo-rotation process in the aqueous solution (left) and *tert*-butanol (right) PMF simulations. Each data point indicates the average value from a given window. For the atomic labels, see Fig. 1 in the main text.

Table S1. Comparison of computed physical properties to experimental data  
for *tert*-butanol

| Properties                                            | Experiment <sup>a</sup> | Computation              |
|-------------------------------------------------------|-------------------------|--------------------------|
| Number density ( $\text{\AA}^{-3}$ )                  | 0.006342                | 0.006395                 |
| Self-diffusion coefficient ( $\text{cm}^2/\text{s}$ ) | N/A                     | $0.77054 \times 10^{-5}$ |
| Heat of vaporization (kcal/mol)                       | 10.20                   | 11.86                    |

a. The value refers to 298.15K; from CRC Handbook.

Table S2. The performance of several semi-empirical methods for the pseudo-rotation barrier of ten neutral phosphates in the QCRNA database <sup>a</sup>

| Reactions                          | Ring Type | DFT Reference <sup>b</sup> | SCC-DFTB <sup>c</sup> | SCC-DFTBPR <sup>c</sup> | AM1 <sup>c</sup>  | PM3 <sup>c</sup>  | MNDO <sup>c</sup> |
|------------------------------------|-----------|----------------------------|-----------------------|-------------------------|-------------------|-------------------|-------------------|
| P(OH)(OCH3)(-O-CH2CH2-O-)(OCH3)_PR | -CH2CH2-  | 7.86                       | -3.95                 | -3.09                   | -3.24             | -6.23             | -5.11             |
| P(OH)(OH)(-O-CH2CH2-O-)(OCH3)_PR   | -CH2CH2-  | 7.76                       | -3.17                 | -3.57                   | -3.51             | -6.85             | -5.48             |
| P(OH)(OH)(-O-CH2CH2-O-)(OH)_PR     | -CH2CH2-  | 5.15                       | -2.22                 | -0.19                   | -1.50             | -4.58             | -3.30             |
| P(OH)(OH)(-O-sugar-O-)(OCH3)_PR    | -ribose-  | 6.75                       | -3.03                 | -3.22                   | -2.97             | -5.88             | -4.00             |
| P(OH)(OH)(-O-sugar-O-)(OH)_PR      | -ribose-  | 4.06                       | -1.68                 | 0.50                    | -0.84             | -3.66             | -2.20             |
| P(OCH3)(OCH3)(OCH3)(OCH3)(OCH3)_PR | acyclic   | 4.33                       | -0.48                 | 0.33                    | -2.28             | -3.41             | -1.72             |
| P(OH)(OCH3)(OCH3)(OCH3)(OCH3)_PR   | acyclic   | 7.60                       | -2.30                 | -1.17                   | -3.91             | -5.72             | -4.50             |
| P(OH)(OH)(OCH3)(OCH3)(OCH3)_PR     | acyclic   | 8.47                       | -2.80                 | -2.22                   | -4.61             | -6.82             | -5.13             |
| P(OH)(OH)(OCH3)(OH)(OCH3)_PR       | acyclic   | 6.36                       | -2.35                 | -1.01                   | -3.95             | -5.90             | -2.89             |
| P(OH)(OH)(OCH3)(OH)(OH)_PR         | acyclic   | 5.81                       | -0.99                 | -1.80                   | -3.22             | -4.74             | -1.69             |
| MAXE <sup>d</sup>                  |           |                            | -3.95/-3.95/-2.8      | -3.57/-3.57/-2.22       | -4.61/-3.51/-4.61 | -6.85/-6.85/-6.82 | -5.48/-5.48/-5.13 |
| RMSE <sup>d</sup>                  |           |                            | 2.50/2.91/1.99        | 2.09/2.57/1.46          | 3.20/2.63/3.68    | 5.50/5.56/5.44    | 3.85/4.19/3.49    |
| MUE <sup>d</sup>                   |           |                            | 2.30/2.81/1.78        | 1.71/2.11/1.31          | 3.00/2.41/3.59    | 5.38/5.44/5.32    | 3.60/-4.02/3.19   |
| MSE <sup>d</sup>                   |           |                            | -2.30/-2.81/-1.78     | -1.54/-1.91/-1.17       | -3.00/-2.41/-3.59 | -5.38/-5.44/-5.32 | -3.60/4.02/-3.19  |

- a) <http://theory.chem.umn.edu/QCRNA/>. The notations follow the QCRNA convention. For the semi-empirical methods including SCC-DFTB(PR), the values are single point energies at the B3LYP geometries.
- b) Gas phase potential energy barrier at the level of B3LYP/6-311++G(3df,2p)//B3LYP/6-31++G(d,p) in kcal/mol.
- c) Barrier difference from the DFT reference, i.e.,  $E_{\text{Semiempirical}} - E_{\text{DFT}}$ ; for AM1, PM3, MNDO, reaction enthalpy is used. “SCC-DFTB” is the second-order method, “SCC-DFTBPR” is the 3<sup>rd</sup>-order parameterization for phosphate chemistry (Ref. 29 in the main text).
- d) MAXE: largest absolute error; RMSE: root-mean-square error; MUE: mean unsigned error; MSE: mean signed error. Before the slash refers to the overall statistics including both the cyclic and acyclic cases; between the slash refers to cyclic cases; after the slash refers to acyclic cases.

Table S3. The performance of several semi-empirical methods for the pseudo-rotation barrier of ten anionic phosphates in the QCRNA database <sup>a</sup>

| Reactions                         | Ring Type | DFT Reference | SCC-DFTB          | SCC-DFTBPR        | AM1                 | PM3               | MNDO              |
|-----------------------------------|-----------|---------------|-------------------|-------------------|---------------------|-------------------|-------------------|
| P(O)(OCH3)(-O-CH2CH2-O-)(OCH3)_PR | -CH2CH2-  | 0.99          | -0.47             | -0.50             | -4.07               | -3.03             | -2.09             |
| P(O)(OH)(-O-CH2CH2-O-)(OCH3)_PR   | -CH2CH2-  | 4.70          | -0.95             | -1.71             | -10.51              | -4.98             | -8.36             |
| P(O)(OH)(-O-CH2CH2-O-)(OH)_PR     | -CH2CH2-  | 2.01          | -1.59             | 1.64              | -10.96              | -7.83             | -6.68             |
| P(O)(OH)(-O-sugar-O-)(OCH3)_PR    | -ribose-  | 5.66          | -0.15             | -1.80             | -5.37               | -4.72             | -8.15             |
| P(O)(OH)(-O-sugar-O-)(OH)_PR      | -ribose-  | 1.38          | -0.44             | 2.04              | -3.78               | -3.08             | 0.00              |
| P(O)(OCH3)(OCH3)(OCH3)(OCH3)_PR   | acyclic   | 1.75          | 1.01              | 1.80              | -4.99               | -3.64             | -0.71             |
| P(O)(OH)(OCH3)(OCH3)(OCH3)_PR     | acyclic   | 6.65          | -1.32             | -3.62             | -5.61               | -2.17             | -4.50             |
| P(O)(OH)(OCH3)(OH)(OCH3)_PR       | acyclic   | 4.15          | -1.31             | -0.66             | -8.57               | -6.63             | -3.09             |
| P(O)(OH)(OCH3)(OH)(OH)_PR         | acyclic   | 8.40          | -3.49             | -6.03             | -8.69               | -7.05             | -7.07             |
| P(O)(OH)(OH)(OCH3)(OCH3)_PR       | acyclic   | 12.36         | -2.31             | -8.48             | -8.24               | -3.47             | -7.90             |
| MAXE                              |           |               | -3.49/-1.59/-3.49 | -8.48/2.04/-8.48  | -10.96/-10.96/-8.69 | -7.83/-7.83/-7.05 | -8.36/-8.36/-7.90 |
| RMSE                              |           |               | 1.61/0.88/2.10    | 3.72/1.63/5.00    | 7.51/7.62/7.39      | 5.01/5.04/4.97    | 5.73/6.09/5.34    |
| MUE                               |           |               | 1.30/0.72/1.89    | 2.83/1.54/4.12    | 7.08/6.94/7.22      | 4.66/4.73/4.59    | 4.86/5.06/4.65    |
| MSE                               |           |               | -1.10/-0.72/-1.48 | -1.73/-0.07/-3.40 | -7.08/-6.94/-7.22   | -4.66/-4.73/-4.59 | -4.86/-5.06/-4.65 |

a. refer to Table S2 for notations.



Table S4. The performance of several semi-empirical methods with geometry optimization for the pseudo-rotation barrier of selected phosphates in the QCRNA database <sup>a</sup>

| Reactions                       | Charge | DFT Reference | SCC-DFTB           | SCC-DFTBPR | AM1   | PM3   | MNDO  |
|---------------------------------|--------|---------------|--------------------|------------|-------|-------|-------|
| P(O)(OH)(-O-sugar-O-)(OCH3)_PR  | -1     | 5.66          | -0.92 <sup>e</sup> | 0.10       | -1.77 | -1.80 | -0.77 |
| P(O)(OH)(-O-sugar-O-)(OH)_PR    | -1     | 1.38          | 0.37               | 3.71       | -1.50 | 1.50  | -0.88 |
| P(OH)(OH)(-O-sugar-O-)(OCH3)_PR | 0      | 6.75          | -2.86              | -3.13      | -6.01 | -5.73 | -3.64 |
| P(OH)(OH)(-O-sugar-O-)(OH)_PR   | 0      | 4.06          | -1.74              | -0.22      | -0.22 | -3.00 | -1.20 |

a. Please refer to Table S2 for notation. Optimizations with SCC-DFTB(PR) are done with CHARMM, while those for AM1/PM3/MNDO are done with Gaussian03.

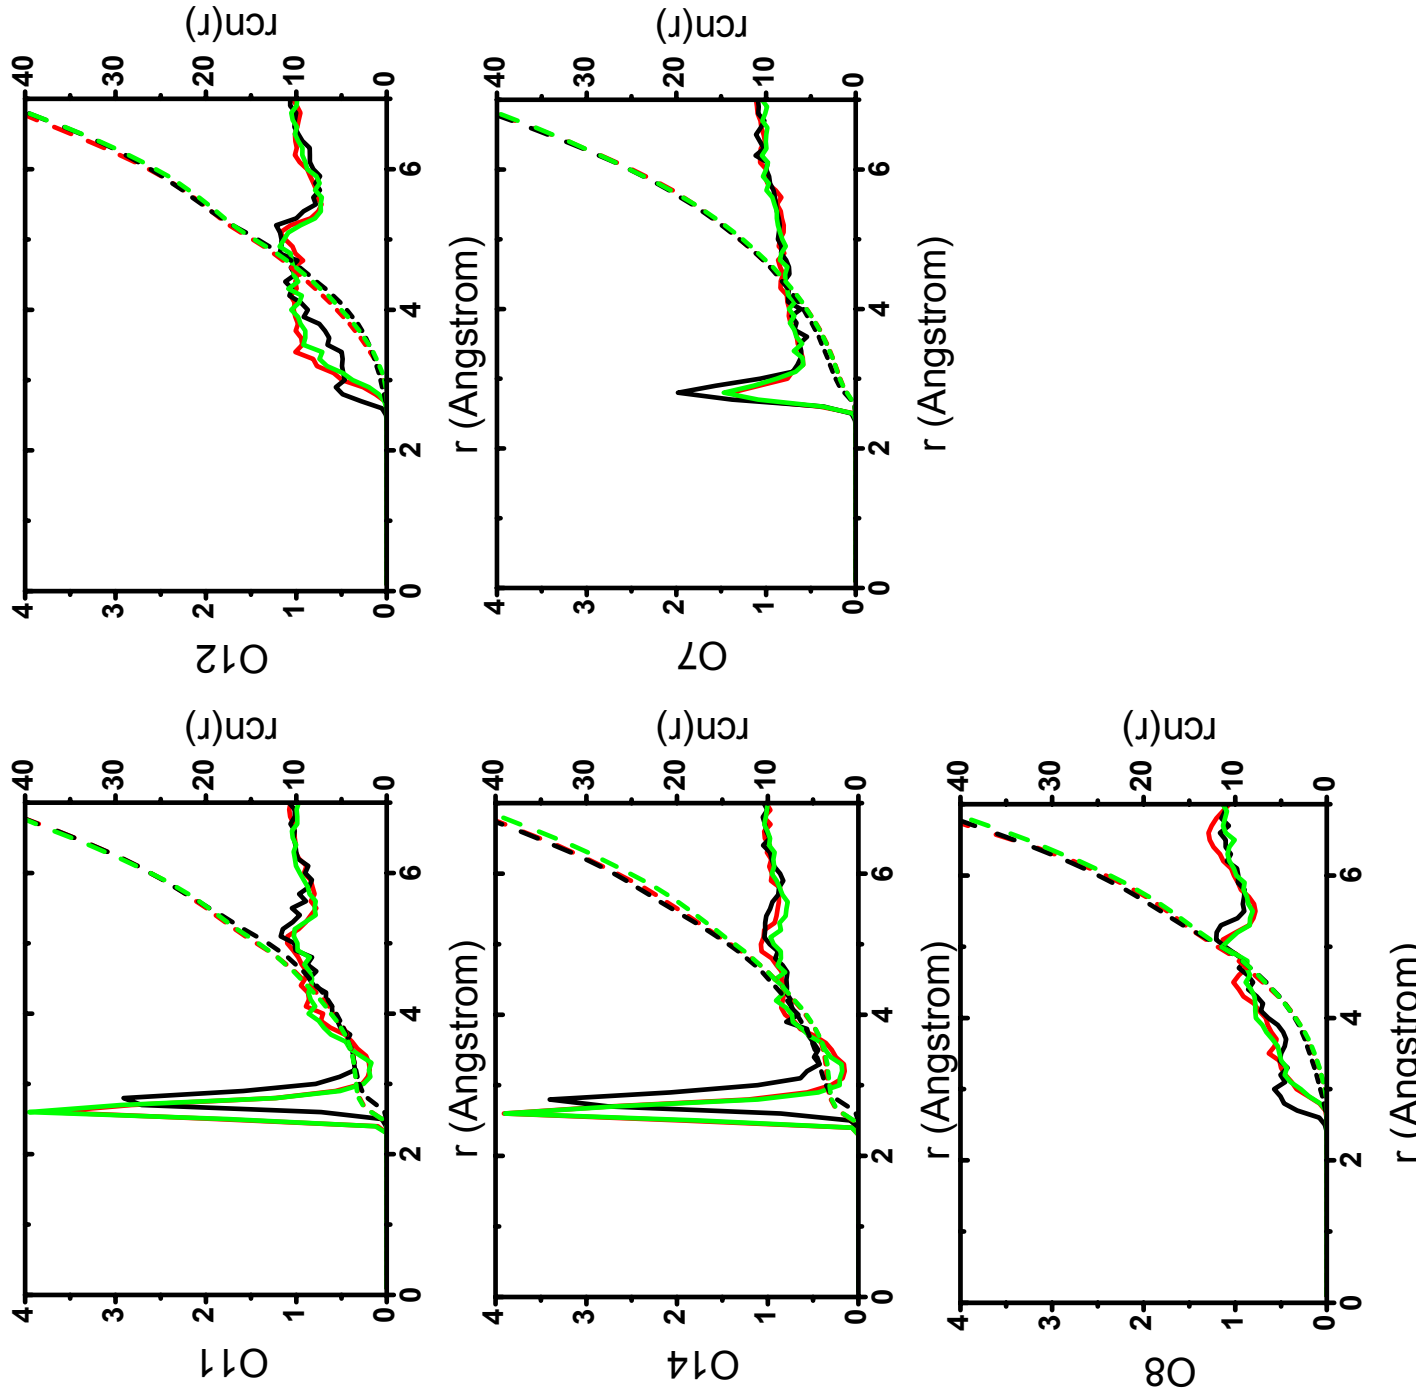

Figure S1

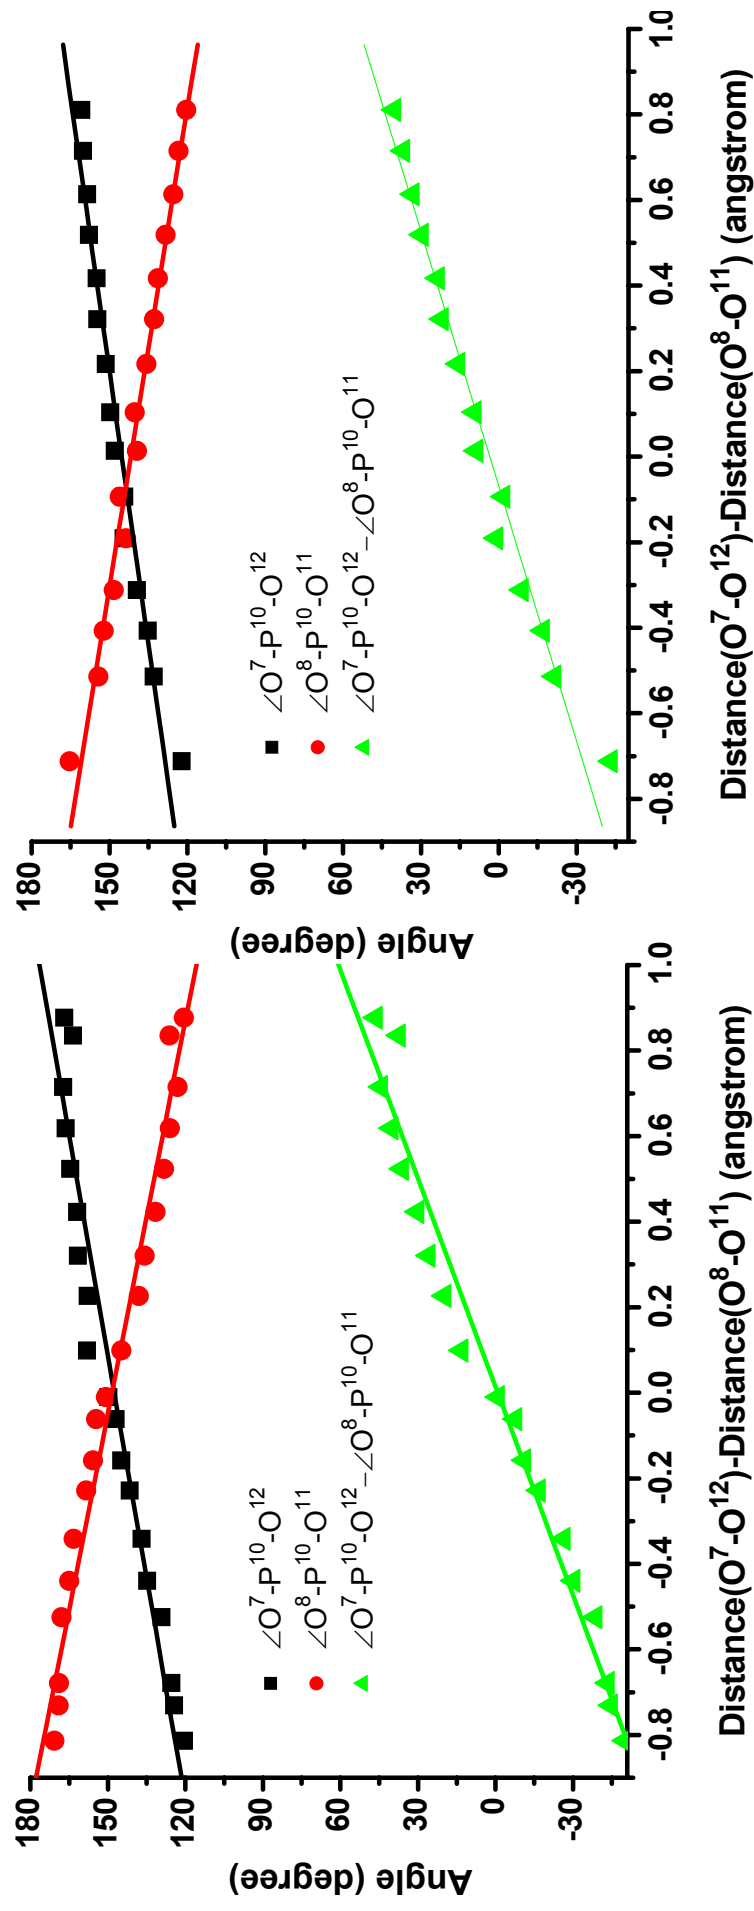

Figure S2
